# Supplementary material for: Effects of Na+Current and Mechanogated Channels in Myofibroblasts on Myocyte Excitability and Repolarization
Source: Hindawi journal article supplement (doi:10.1155/2016/6189374), 2016-01-01
Supplement: f1 [file 6189374.f1.pdf]

# Supplementary Material

## Model Equations

Table 1 through 23 contained all the equations, parameters values and initial conditions necessary to carry out the simulations presented in this article. Unless otherwise noted, the units are as follows: time in seconds (s), voltage in millivolts (mV), concentration in millimoles/liter (mmol/L), current in picoamperes (pA), conductance in nanosiemens (nS), capacitance in picofarads (pF), volume in nanoliters (nL), and temperature in kelvin (K).

### Atrial Myocyte Model

The atrial myocyte model was represented by the Maleckar et al. mathematical model [1], which was based on a previous model of the adult human atrial myocyte action potential (AP), that of Nygren et al. [2]. The stimulus used to evoke an AP was a rectangular current pulse ( $I_{stim}$ ) with amplitude of 280 pA and duration of 6 ms. Equations of the stretch-activated current ( $I_{SAC}$ ) were taken from Kuijpers et al [3], which were assumed to be a nonselective cation current with a near-linear current-voltage relation on the basis of experimental observations [4]. When  $I_{SAC}$  was integrated in the myofibroblast-myocyte (Mfb-M) coupling, equations of intracellular ion concentrations of  $Na^+$ ,  $K^+$  and  $Ca^{2+}$  ( $[Na^+]_i$ ,  $[K^+]_i$ , and  $[Ca^{2+}]_i$ ) followed Table 12. Without  $I_{SAC}$  in Mfb-M coupling, they followed Table 8.

**Table 1.  $Na^+$  current:  $I_{Na}$**

---

|                                                                                                                       |                                                                 |
|-----------------------------------------------------------------------------------------------------------------------|-----------------------------------------------------------------|
| $I_{Na} = P_{Na} m^3 (0.9 h_1 + 0.1 h_2) [Na^+]_c V_M \frac{F^2 e^{(V_M - E_{Na})F/RT} - 1.0}{RT e^{V_M F/RT} - 1.0}$ | $\bar{h} = \frac{1.0}{1.0 + e^{(V_M + 63.6)/5.3}}$              |
| $\bar{m} = \frac{1.0}{1.0 + e^{(V_M + 27.12)/-8.21}}$                                                                 | $\tau_m = 0.000042 e^{-((V_M + 25.57)/28.8)^2} + 0.000024$      |
| $\frac{dm}{dt} = \frac{\bar{m} - m}{\tau_m}$                                                                          | $\tau_{h_1} = \frac{0.03}{1.0 + e^{(V_M + 35.1)/3.2}} + 0.0003$ |
| $\frac{dh_1}{dt} = \frac{\bar{h} - h_1}{\tau_{h_1}}$                                                                  | $\tau_{h_2} = \frac{0.12}{1.0 + e^{(V_M + 35.1)/3.2}} + 0.003$  |
| $\frac{dh_2}{dt} = \frac{\bar{h} - h_2}{\tau_{h_2}}$                                                                  |                                                                 |
| $E_{Na} = \frac{RT}{F} \log \frac{[Na^+]_c}{[Na^+]_i}$                                                                |                                                                 |

---

**Table 2.  $Ca^{2+}$  current:  $I_{CaL}$**

---


$$I_{CaL} = \bar{g}_{CaL} d_L [f_{Ca} f_{L1} + (1 - f_{Ca}) f_{L2}] (V_M - E_{Ca,app})$$

$$\bar{d}_L = \frac{1.0}{1.0 + e^{(V_M+9.0)/-5.8}}$$

$$\frac{dd_L}{dt} = \frac{\bar{d}_L - d_L}{\tau_{d_L}}$$

$$\bar{f}_{L1} = \frac{\bar{f}_L - f_{L1}}{\tau_{f_{L1}}}$$

$$\frac{df_{L1}}{dt} = \frac{\bar{f}_{L1} - f_{L1}}{\tau_{f_{L1}}}$$

$$\bar{f}_{L2} = \frac{\bar{f}_L - f_{L2}}{\tau_{f_{L2}}}$$

$$\frac{df_{L2}}{dt} = \frac{\bar{f}_{L2} - f_{L2}}{\tau_{f_{L2}}}$$

$$f_{Ca} = \frac{[Ca^{2+}]_d}{[Ca^{2+}]_d + k_{Ca}}$$

$$\bar{f}_L = \frac{1.0}{1.0 + e^{(V_M+27.4)/7.1}}$$

$$\tau_{d_L} = 0.0027e^{-((V_M+35.0)/30.0)^2} + 0.002$$

$$\tau_{f_{L1}} = 0.161e^{-((V_M+40.0)/14.4)^2} + 0.01$$

$$\tau_{f_{L2}} = 1.3323e^{-((V_M+40.0)/14.2)^2} + 0.0626$$

**Table 3. Transient and ultrarapidly delayed rectifier K<sup>+</sup> currents:  $I_t$  and  $I_{Kur}$**

$$I_t = \bar{g}_t r s (V_M - E_K)$$

$$\bar{r} = \frac{1.0}{1.0 + e^{(V_M-1.0)/-11.0}}$$

$$\frac{dr}{dt} = \frac{\bar{r} - r}{\tau_r}$$

$$\bar{s} = \frac{1.0}{1.0 + e^{(V_M+40.5)/11.5}}$$

$$\tau_r = 0.0035e^{-(V_M/30.0)^2} + 0.0015$$

$$\frac{ds}{dt} = \frac{\bar{s} - s}{\tau_s}$$

$$\tau_s = 0.025635e^{-((V_M+52.45)/15.89)^2} + 0.01414$$

$$I_{Kur} = \bar{g}_{Kur} r_{Kur} s_{Kur} (V_M - E_K)$$

$$\bar{r}_{Kur} = \frac{1.0}{1.0 + e^{(V_M+6.0)/-8.6}}$$

$$\frac{dr_{Kur}}{dt} = \frac{\bar{r}_{Kur} - r_{Kur}}{\tau_{r_{Kur}}}$$

$$\bar{s}_{Kur} = \frac{1.0}{1.0 + e^{(V_M+7.5)/10.0}}$$

$$\tau_{r_{Kur}} = \frac{0.009}{1.0 + e^{(V_M+5.0)/12.0}} + 0.0005$$

$$\frac{ds_{Kur}}{dt} = \frac{\bar{s}_{Kur} - s_{Kur}}{\tau_{s_{Kur}}}$$

$$\tau_{s_{Kur}} = \frac{0.59}{1.0 + e^{(V_M+60.0)/10.0}} + 3.05$$

$$E_K = \frac{RT}{F} \log \frac{[K^+]_c}{[K^+]_i}$$

**Table 4. Delayed rectifier K<sup>+</sup> currents:  $I_{K,s}$  and  $I_{K,r}$**

$$I_{K,s} = \bar{g}_{K,s} n (V_M - E_K)$$

$$\bar{n} = \frac{1.0}{1.0 + e^{(V_M-19.9)/-12.7}}$$

$$\frac{dn}{dt} = \frac{\bar{n} - n}{\tau_n}$$

$$\tau_n = 0.7 + 0.4e^{-((V_M-20.0)/20.0)^2}$$

$$E_K = \frac{RT}{F} \log \frac{[K^+]_c}{[K^+]_i}$$

$$I_{K,r} = \bar{g}_{K,r} p_a p_i (V_M - E_K)$$

$$\bar{p}_a = \frac{1.0}{1.0 + e^{(V_M+15.0)/-6.0}}$$

$$p_i = \frac{1.0}{1.0 + e^{(V_M+55.0)/24.0}}$$

$$\frac{dp_a}{dt} = \frac{\bar{p}_a - p_a}{\tau_{p_a}}$$

$$\tau_{p_a} = 0.03118 + 0.21718e^{-((V_M+20.1376)/22.1996)^2}$$

**Table 5. Inward rectifier K<sup>+</sup> currents:  $I_{K1}$** 

$$I_{K1} = \bar{g}_{K1} [K^+]_c^{0.4457} \frac{V_M - E_K}{1.0 + e^{1.5(V_M - E_K + 3.6)F/RT}}$$

$$E_K = \frac{RT}{F} \log \frac{[K^+]_c}{[K^+]_i}$$

**Table 6. Background inward currents:  $I_{B,Na}$  and  $I_{B,Ca}$** 

$$I_{B,Na} = \bar{g}_{B,Na} (V_M - E_{Na}) \quad I_{B,Ca} = \bar{g}_{B,Ca} (V_M - E_{Ca})$$

$$E_{Na} = \frac{RT}{F} \log \frac{[Na^+]_c}{[Na^+]_i} \quad E_{Ca} = \frac{RT}{2F} \log \frac{[Ca^{2+}]_c}{[Ca^{2+}]_i}$$

**Table 7. Pump and exchanger currents:  $I_{NaK}$ ,  $I_{CaP}$ , and  $I_{NaCa}$** 

$$I_{NaK} = \bar{I}_{NaK} \frac{[K^+]_c}{[K^+]_c + k_{NaK,K}} \cdot \frac{[Na^+]_i^{1.5}}{[Na^+]_i^{1.5} + k_{NaK,Na}^{1.5}} \cdot \frac{V_M + 150.0}{V_M + 200.0}$$

$$I_{CaP} = \bar{I}_{CaP} \frac{[Ca^{2+}]_i}{[Ca^{2+}]_i + k_{CaP}}$$

$$I_{NaCa} = k_{NaCa} \frac{[Na^+]_i^3 [Ca^{2+}]_c e^{\gamma VF/RT} - [Na^+]_c^3 [Ca^{2+}]_i e^{(\gamma-1.0)VF/RT}}{1.0 + d_{NaCa} ([Na^+]_c^3 [Ca^{2+}]_i + [Na^+]_i^3 [Ca^{2+}]_c)}$$

**Table 8. Intracellular ion concentrations:  $[Na^+]_i$ ,  $[K^+]_i$ , and  $[Ca^{2+}]_i$** 

$$\frac{d[Na^+]_i}{dt} = - \frac{I_{Na} + I_{B,Na} + 3I_{NaK} + 3I_{NaCa}}{Vol_i F}$$

$$\frac{d[K^+]_i}{dt} = - \frac{I_t + I_{Kur} + I_{K1} + I_{K,s} + I_{K,r} - 2I_{NaK}}{Vol_i F}$$

$$\frac{d[Ca^{2+}]_i}{dt} = - \frac{-I_{di} + I_{B,Ca} + I_{CaP} - 2I_{NaCa} + I_{up} - I_{rel}}{2.0 Vol_i F} - \frac{dO}{dt}$$

$$\frac{dO}{dt} = 0.08 \frac{dO_{TC}}{dt} + 0.16 \frac{dO_{TMGC}}{dt} + 0.045 \frac{dO_c}{dt}$$

$$\frac{d[Ca^{2+}]_d}{dt} = - \frac{I_{CaL} - I_{di}}{2.0 Vol_d F}$$

$$I_{di} = ([Ca^{2+}]_d - [Ca^{2+}]_i) \frac{2F Vol_d}{\tau_{di}}$$

**Table 9. Cleft space ion concentrations:  $[Na^+]_c$ ,  $[K^+]_c$ , and  $[Ca^{2+}]_c$** 

$$\frac{d[Na^+]_c}{dt} = \frac{[Na^+]_b - [Na^+]_c}{\tau_{Na}} + \frac{I_{Na} + I_{B,Na} + 3I_{NaK} + 3I_{NaCa}}{Vol_c F}$$

$$\frac{d[K^+]_c}{dt} = \frac{[K^+]_b - [K^+]_c}{\tau_K} + \frac{I_t + I_{Kur} + I_{K1} + I_{K,s} + I_{K,r} - 2I_{NaK}}{Vol_c F}$$

$$\frac{d[Ca^{2+}]_c}{dt} = \frac{[Ca^{2+}]_b - [Ca^{2+}]_c}{\tau_{Ca}} + \frac{I_{CaL} + I_{B,Ca} + I_{CaP} - 2I_{NaCa}}{2.0 Vol_c F}$$

**Table 10. Intracellular Ca<sup>2+</sup> buffering**

$$\begin{aligned} \frac{dO_C}{dt} &= 200000.0[\text{Ca}^{2+}]_i(1.0 - O_C) - 476.0O_C \\ \frac{dO_{TC}}{dt} &= 78400.0[\text{Ca}^{2+}]_i(1.0 - O_{TC}) - 392.0O_{TC} \\ \frac{dO_{TMgC}}{dt} &= 200000.0[\text{Ca}^{2+}]_i(1.0 - O_{TMgC} - O_{TMgMg}) - 6.6O_{TMgC} \\ \frac{dO_{TMgMg}}{dt} &= 2000.0[\text{Mg}^{2+}]_i(1.0 - O_{TMgC} - O_{TMgMg}) - 666.0O_{TMgMg} \end{aligned}$$

**Table 11. Ca<sup>2+</sup> handling by the sarcoplasmic reticulum**

$$\begin{aligned} I_{up} &= \bar{I}_{up} \frac{[\text{Ca}^{2+}]_i/k_{cyca} - k_{xcs}^2[\text{Ca}^{2+}]_{up}/k_{srca}}{([\text{Ca}^{2+}]_i + k_{cyca})/k_{cyca} + k_{xcs}([\text{Ca}^{2+}]_{up} + k_{srca})/k_{srca}} \\ I_{tr} &= ([\text{Ca}^{2+}]_{up} - [\text{Ca}^{2+}]_{rel}) \frac{2F \text{Vol}_{rel}}{\tau_{tr}} \\ I_{rel} &= \alpha_{rel} \left( \frac{F_2}{F_2 + 0.25} \right)^2 ([\text{Ca}^{2+}]_{rel} - [\text{Ca}^{2+}]_i) \\ \frac{dO_{Calse}}{dt} &= 480.0[\text{Ca}^{2+}]_{rel}(1.0 - O_{Calse}) - 400.0O_{Calse} \\ \frac{d[\text{Ca}^{2+}]_{rel}}{dt} &= \frac{I_{tr} - I_{rel}}{2F \text{Vol}_{rel}} - 31.0 \frac{dO_{Calse}}{dt} \\ \frac{d[\text{Ca}^{2+}]_{up}}{dt} &= \frac{I_{up} - I_{tr}}{2F \text{Vol}_{up}} \\ \frac{dF_1}{dt} &= r_{recov}(1.0 - F_1 - F_2) - r_{act} F_1 \\ \frac{dF_2}{dt} &= r_{act} F_1 - r_{inact} F_2 \\ r_{act} &= 203.8 \left[ \left( \frac{[\text{Ca}^{2+}]_i}{[\text{Ca}^{2+}]_i + k_{rel,i}} \right)^4 + \left( \frac{[\text{Ca}^{2+}]_d}{[\text{Ca}^{2+}]_d + k_{rel,d}} \right)^4 \right] \\ r_{inact} &= 33.96 + 339.6 \left( \frac{[\text{Ca}^{2+}]_i}{[\text{Ca}^{2+}]_i + k_{rel,i}} \right)^4 \end{aligned}$$

**Table 12. Stretch-activated current: I<sub>SAC</sub>**

$$\begin{aligned} I_{SAC} &= I_{SAC,Na} + I_{SAC,K} + I_{SAC,Ca} \\ I_{SAC,Na} &= \bar{P}_{Na} g_{SAC} \frac{z_{Na}^2 F^2 V_M}{RT} \cdot \frac{[\text{Na}^+]_i - [\text{Na}^+]_c e^{-(z_{Na} F V_M)/RT}}{1.0 - e^{-(z_{Na} F V_M)/RT}} \\ I_{SAC,K} &= \bar{P}_K g_{SAC} \frac{z_K^2 F^2 V_M}{RT} \cdot \frac{[\text{K}^+]_i - [\text{K}^+]_c e^{-(z_K F V_M)/RT}}{1.0 - e^{-(z_K F V_M)/RT}} \\ I_{SAC,Ca} &= \bar{P}_{Ca} g_{SAC} \frac{z_{Ca}^2 F^2 V_M}{RT} \cdot \frac{[\text{Ca}^{2+}]_i - [\text{Ca}^{2+}]_c e^{-(z_{Ca} F V_M)/RT}}{1.0 - e^{-(z_{Ca} F V_M)/RT}} \end{aligned}$$

$$g_{SAC} = \frac{G_{SAC}}{1.0 + K_{SAC} e^{-(\alpha_{SAC}(\lambda-1))}}$$

$$\bar{P}_{Na} : \bar{P}_K : \bar{P}_{Ca} = 1:1:1$$

$$\frac{d[Na^+]_i}{dt} = - \frac{I_{Na} + I_{B,Na} + 3I_{NaK} + 3I_{NaCa} + I_{SAC,Na}}{Vol_i F}$$

$$\frac{d[K^+]_i}{dt} = - \frac{I_t + I_{Kur} + I_{K1} + I_{Ks} + I_{Kr} - 2I_{NaK} + I_{SAC,K}}{Vol_i F}$$

$$\frac{d[Ca^{2+}]_i}{dt} = - \frac{-I_{di} + I_{B,Ca} + I_{CaP} - 2I_{NaCa} + I_{up} - I_{rel} + I_{SAC,Ca}}{2.0 Vol_i F} - \frac{dO}{dt}$$


---

### Atrial Myofibroblast Model

The atrial Mfb model was represented by the MacCannell et al. mathematical model [5]. Mathematical formulations of the currents through voltage-gated sodium channels ( $I_{Na\_Mfb}$ ) and mechano-gated channels ( $I_{MGC\_Mfb}$ ) was based on experimental data from Chatelier et al. [6] and Kamkin et al. [7], respectively.

**Table 13. Time- and voltage-dependent K<sup>+</sup> current:  $I_{Kv\_Mfb}$**

$$I_{Kv\_Mfb} = \bar{g}_{Kv\_Mfb} r_{Kv} s_{Kv} (V_{Mfb} - E_{K,Mfb})$$

$$\bar{r}_{Kv} = (1.0 + e^{-(V_{Mfb}+20.0)/11.0})^{-1} \quad \bar{s}_{Kv} = (1.0 + e^{(V_{Mfb}+23.0)/7.0})^{-1}$$

$$\frac{dr_{Kv}}{dt} = \frac{\bar{r}_{Kv} - r_{Kv}}{\tau_{r_{Kv}}} \quad \tau_{r_{Kv}} = 0.0203 + 0.138 \cdot e^{-(V_{Mfb}+20.0)/25.9)^2}$$

$$\frac{ds_{Kv}}{dt} = \frac{\bar{s}_{Kv} - s_{Kv}}{\tau_{s_{Kv}}} \quad \tau_{s_{Kv}} = 1.574 + 5.268 \cdot e^{-(V_{Mfb}+23.0)/22.7)^2}$$

$$E_{K,Mfb} = \frac{RT}{F} \log \frac{[K^+]_{c,Mfb}}{[K^+]_{i,Mfb}}$$


---

**Table 14. Time-independent inward-rectifying K<sup>+</sup> current:  $I_{K1\_Mfb}$**

$$I_{K1\_Mfb} = \bar{g}_{K1,Mfb} (\alpha_{K1} / (\alpha_{K1} + \beta_{K1})) (V_{Mfb} - E_{K,Mfb})$$

$$\alpha_{K1} = 0.1 (1.0 + e^{0.06(V_{Mfb} - E_K - 200.0)})^{-1}$$

$$\beta_{K1} = \frac{3.0 \cdot e^{0.0002(V_{Mfb} - E_K + 100.0)} + e^{0.1(V_{Mfb} - E_K + 10.0)}}{1.0 + e^{-0.5(V_{Mfb} - E_K)}}$$

$$E_{K,Mfb} = \frac{RT}{F} \log \frac{[K^+]_{c,Mfb}}{[K^+]_{i,Mfb}}$$


---

**Table 15. Na<sup>+</sup>-K<sup>+</sup> pump current:  $I_{NaK\_Mfb}$**

---


$$I_{\text{NaK\_Mfb}} = \bar{I}_{\text{NaK\_Mfb}} \cdot \frac{[\text{K}^+]_{\text{c,Mfb}}}{[\text{K}^+]_{\text{c,Mfb}} + k_{\text{mK}}} \cdot \frac{[\text{Na}^+]_{\text{i,Mfb}}^{1.5}}{[\text{Na}^+]_{\text{i,Mfb}}^{1.5} + k_{\text{mNa}}^{1.5}} \cdot \frac{V_{\text{Mfb}} + 150.0}{V_{\text{Mfb}} + 200.0}$$


---

**Table 16. Background inward current:  $I_{\text{B,Na\_Mfb}}$**

---


$$I_{\text{B,Na\_Mfb}} = \bar{g}_{\text{B,Na,Mfb}}(V_{\text{Mfb}} - E_{\text{Na,Mfb}})$$

$$E_{\text{Na,Mfb}} = \frac{RT}{F} \log \frac{[\text{Na}^+]_{\text{c,Mfb}}}{[\text{Na}^+]_{\text{i,Mfb}}}$$


---

**Table 17.  $\text{Na}^+$  current:  $I_{\text{Na\_Mfb}}$**

---


$$I_{\text{Na\_Mfb}} = \bar{g}_{\text{Na,Mfb}} m_{\text{Mfb}} j_{\text{Mfb}}^{0.12} (V_{\text{Mfb}} - E_{\text{Na,Mfb}})$$

$$\bar{m}_{\text{Mfb}} = \frac{-0.0102 - 1.0063}{1.0 + e^{(V_{\text{Mfb}} + 42.1)/10.53}} + 1.0063 \quad \bar{j}_{\text{Mfb}} = \frac{1.04 - 0.004}{1.0 + e^{(V_{\text{Mfb}} + 84.82)/9.4}} + 0.004$$

$$\frac{dm_{\text{Mfb}}}{dt} = \frac{\bar{m}_{\text{Mfb}} - m_{\text{Mfb}}}{\tau_{m_{\text{Mfb}}}} \quad \frac{dj_{\text{Mfb}}}{dt} = \frac{\bar{j}_{\text{Mfb}} - j_{\text{Mfb}}}{\tau_{j_{\text{Mfb}}}}$$

$$\tau_{m_{\text{Mfb}}} = \frac{1}{\alpha_{m_{\text{Mfb}}} + \beta_{m_{\text{Mfb}}}} \quad \tau_{j_{\text{Mfb}}} = \frac{1}{\alpha_{j_{\text{Mfb}}} + \beta_{j_{\text{Mfb}}}}$$

$$\alpha_{m_{\text{Mfb}}} = \begin{cases} 0.0077 \frac{V_{\text{Mfb}} + 68.19}{1.0 - e^{-0.18(V_{\text{Mfb}} + 68.19)}} \\ 0.0433, & \text{if } V_{\text{Mfb}} = -68.19 \end{cases}$$

$$\beta_{m_{\text{Mfb}}} = 0.004e^{-V_{\text{Mfb}}/11.98}$$

$$\alpha_{j_{\text{Mfb}}} = \begin{cases} (-14.5e^{0.17V_{\text{Mfb}}} + 1.8e^{1.56V_{\text{Mfb}}}) \cdot \frac{V_{\text{Mfb}} + 35.73}{1.0 + e^{3.31(V_{\text{Mfb}} + 3.86)}} \\ 0, & \text{if } V_{\text{Mfb}} \geq -40.0 \end{cases}$$

$$\beta_{j_{\text{Mfb}}} = \begin{cases} 5.05 \times 10^{-5} \frac{e^{-0.0995V_{\text{Mfb}}}}{1.0 + e^{-0.01(V_{\text{Mfb}} - 84.02)}} \\ 0.11 \frac{e^{-4.13 \times 10^{-4} V_{\text{Mfb}}}}{1.0 + e^{-0.09(V_{\text{Mfb}} + 42.44)}}, & \text{if } V_{\text{Mfb}} \geq -40.0 \end{cases}$$

$$E_{\text{Na,Mfb}} = \frac{RT}{F} \log \frac{[\text{Na}^+]_{\text{c,Mfb}}}{[\text{Na}^+]_{\text{i,Mfb}}}$$


---

**Table 18. Mechano-gated channel mediated current:  $I_{\text{MGC\_Mfb}}$**

---


$$I_{\text{MGC\_Mfb}} = \bar{g}_{\text{MGC,Mfb}} \cdot (V_{\text{Mfb}} - E_{\text{MGC,Mfb}})$$


---

**Table 19. Intracellular ion concentrations:  $[\text{Na}^+]_{\text{i,Mfb}}$ ,  $[\text{K}^+]_{\text{i,Mfb}}$ , and  $[\text{Ca}^{2+}]_{\text{i,Mfb}}$**

---


$$\text{Without } I_{\text{Na\_Mfb}}: \frac{d[\text{Na}^+]_{\text{i,Mfb}}}{dt} = -\frac{I_{\text{B,Na\_Mfb}} + 3I_{\text{NaK\_Mfb}}}{\text{Vol}_{\text{i,Mfb}}F}$$

$$\text{With } I_{\text{Na\_Mfb}}: \frac{d[\text{Na}^+]_{\text{i,Mfb}}}{dt} = -\frac{I_{\text{Na\_Mfb}} + I_{\text{B,Na\_Mfb}} + 3I_{\text{NaK\_Mfb}}}{\text{Vol}_{\text{i,Mfb}}F}$$


---

$$\frac{d[K^+]_{i,Mfb}}{dt} = -\frac{I_{K1\_Mfb} + I_{Kv\_Mfb}}{Vol_{i,Mfb} F}$$

## Mfb-M electrical coupling

**Table 20. Transmembrane potential of myocyte and Mfb**

$$\frac{dV_M}{dt} = -\frac{1}{C_{m,M}} \left( I_M(V_M, t) + \sum_{i=1}^n G_{gap}(V_M - V_{Mfb,i}) \right)$$

$$\frac{dV_{Mfb,i}}{dt} = -\frac{1}{C_{m,Mfb}} \left( I_{Mfb,i}(V_{Mfb,i}, t) + G_{gap}(V_{Mfb,i} - V_M) \right)$$

Without  $I_{SAC}$ :  $I_M(V_M, t) =$

$$I_{Na} + I_{CaL} + I_t + I_{Kur} + I_{K1} + I_{K,r} + I_{K,s} + I_{B,Na} + I_{B,Ca} + I_{NaK} + I_{CaP} + I_{NaCa} - I_{Stim}$$

With  $I_{SAC}$ :  $I_M(V_M, t) =$

$$I_{Na} + I_{CaL} + I_t + I_{Kur} + I_{K1} + I_{K,r} + I_{K,s} + I_{B,Na} + I_{B,Ca} + I_{NaK} + I_{CaP} + I_{NaCa} + I_{SAC} - I_{Stim}$$

Without  $I_{Na\_Mfb}$  and  $I_{MGC\_Mfb}$ :  $I_{Mfb,i}(V_{Mfb,i}, t) = I_{Kv\_Mfb} + I_{K1\_Mfb} + I_{NaK\_Mfb} + I_{B,Na\_Mfb}$

With  $I_{Na\_Mfb}$  and  $I_{MGC\_Mfb}$ :  $I_{Mfb,i}(V_{Mfb,i}, t) =$

$$I_{Kv\_Mfb} + I_{K1\_Mfb} + I_{NaK\_Mfb} + I_{B,Na\_Mfb} + I_{Na\_Mfb} + I_{MGC\_Mfb}$$

**Table 21. Parameter values**

$$[Na^+]_b = 130.0 \text{ mmol/L}$$

$$[K^+]_b = 5.4 \text{ mmol/L}$$

$$[Ca^{2+}]_b = 1.8 \text{ mmol/L}$$

$$[Mg^{2+}]_i = 2.5 \text{ mmol/L}$$

$$E_{Ca,app} = 60.0 \text{ mV}$$

$$k_{Ca} = 0.025 \text{ mmol/L}$$

$$R = 8314.0 \text{ mJ/molK}$$

$$T = 306.15 \text{ K}$$

$$F = 96487.0 \text{ C/mol}$$

$$C_{m,M} = 0.05 \text{ nF}$$

$$Vol_i = 0.005884 \text{ nL}$$

$$Vol_c = 0.136 Vol_i$$

$$Vol_d = 0.02 Vol_i$$

$$Vol_{rel} = 0.0000441 \text{ nL}$$

$$Vol_{up} = 0.0003969 \text{ nL}$$

$$\tau_{Na} = 14.3 \text{ s}$$

$$\tau_K = 10.0 \text{ s}$$

$$\tau_{Ca} = 24.7 \text{ s}$$

$$k_{CaP} = 0.0002 \text{ mmol/L}$$

$$k_{NaCa} = 0.0374842 \text{ pA/(mmol/L)}^4$$

$$\gamma = 0.45$$

$$d_{NaCa} = 0.0003 \text{ (mmol/L)}^{-4}$$

$$\bar{I}_{up} = 2800.0 \text{ pA}$$

$$k_{cyca} = 0.0003 \text{ mmol/L}$$

$$K_{srca} = 0.5 \text{ mmol/L}$$

$$K_{xcs} = 0.4$$

$$\tau_{tr} = 0.01 \text{ s}$$

$$\alpha_{rel} = 200000.0 \text{ pA/L/mmol}$$

$$k_{rel,i} = 0.0003 \text{ mmol/L}$$

$$k_{rel,d} = 0.003 \text{ mmol/L}$$

$$r_{recov} = 0.815 \text{ s}^{-1}$$

$$K_{SAC} = 100$$

$$\alpha_{SAC} = 3$$

$$\lambda = 1.2$$

$$C_{m,Mfb} = 6.3 \text{ pF}$$

$$Vol_{i,Mfb} = 0.00137 \text{ nL}$$

|                                           |                                                         |
|-------------------------------------------|---------------------------------------------------------|
| $\tau_{dt} = 0.01 \text{ s}$              | $[\text{Na}^+]_{c,\text{Mfb}} = 130.011 \text{ mmol/L}$ |
| $\bar{I}_{\text{NaK}} = 68.55 \text{ pA}$ | $[\text{K}^+]_{c,\text{Mfb}} = 5.3581 \text{ mmol/L}$   |
| $k_{\text{NaK,K}} = 1.0 \text{ mmol/L}$   | $k_{\text{mK}} = 1.0 \text{ mmol}$                      |
| $k_{\text{NaK,Na}} = 11.0 \text{ mmol/L}$ | $k_{\text{mNa}} = 11.0 \text{ mmol}$                    |
| $\bar{I}_{\text{CaP}} = 4.0 \text{ pA}$   | $\bar{I}_{\text{NaK,Mfb}} = 10.36 \text{ pA}$           |

**Table 22. Maximum conductance values**

|                                               |                                                  |
|-----------------------------------------------|--------------------------------------------------|
| $P_{\text{Na}} = 0.0018 \text{ nL/s}$         | $\bar{g}_{\text{B,Ca}} = 0.078681 \text{ nS}$    |
| $\bar{g}_{\text{CaL}} = 6.75 \text{ nS}$      | $G_{\text{SAC}} = 0.015 \text{ } \mu\text{m/s}$  |
| $\bar{g}_{\text{t}} = 8.25 \text{ nS}$        | $\bar{g}_{\text{Kv,Mfb}} = 1.575 \text{ nS}$     |
| $\bar{g}_{\text{Kur}} = 2.25 \text{ nS}$      | $\bar{g}_{\text{K1,Mfb}} = 3.038 \text{ nS}$     |
| $\bar{g}_{\text{Ks}} = 1.0 \text{ nS}$        | $\bar{g}_{\text{B,Na,Mfb}} = 0.05985 \text{ nS}$ |
| $\bar{g}_{\text{Kr}} = 0.5 \text{ nS}$        | $\bar{g}_{\text{Na,Mfb}} = 0.756 \text{ nS}$     |
| $\bar{g}_{\text{K1}} = 3.1 \text{ nS}$        | $\bar{g}_{\text{MGC,Mfb}} = 0.043 \text{ nS}$    |
| $\bar{g}_{\text{B,Na}} = 0.060599 \text{ nS}$ |                                                  |

**Table 23. Initial conditions**

|                                                                   |                                                         |
|-------------------------------------------------------------------|---------------------------------------------------------|
| $V_{\text{M}} = -74.2525 \text{ mV}$                              | $s_{\text{Kur}} = 0.9673$                               |
| $[\text{Na}^+]_{\text{c}} = 130.0221 \text{ mmol/L}$              | $n = 4.374 \times 10^{-3}$                              |
| $[\text{K}^+]_{\text{c}} = 5.5602 \text{ mmol/L}$                 | $p_{\text{a}} = 5.3 \times 10^{-5}$                     |
| $[\text{Ca}^{2+}]_{\text{c}} = 1.8158 \text{ mmol/L}$             | $F_1 = 0.4701$                                          |
| $[\text{Na}^+]_{\text{i}} = 8.5168 \text{ mmol/L}$                | $F_2 = 0.0028$                                          |
| $[\text{K}^+]_{\text{i}} = 129.486 \text{ mmol/L}$                | $O = 1.382$                                             |
| $[\text{Ca}^{2+}]_{\text{i}} = 6.5 \times 10^{-5} \text{ mmol/L}$ | $O_{\text{C}} = 0.0268$                                 |
| $[\text{Ca}^{2+}]_{\text{d}} = 7.1 \times 10^{-5} \text{ mmol/L}$ | $O_{\text{Calse}} = 0.4315$                             |
| $[\text{Ca}^{2+}]_{\text{up}} = 0.6492 \text{ mmol/L}$            | $O_{\text{TC}} = 0.0129$                                |
| $[\text{Ca}^{2+}]_{\text{rel}} = 0.6326 \text{ mmol/L}$           | $O_{\text{TMgC}} = 0.1904$                              |
| $m = 3.289 \times 10^{-3}$                                        | $O_{\text{TMgMg}} = 0.7145$                             |
| $h_1 = 0.8772$                                                    | $[\text{K}^+]_{\text{i,Mfb}} = 129.4349 \text{ mmol/L}$ |
| $h_2 = 0.8739$                                                    | $[\text{Na}^+]_{\text{i,Mfb}} = 8.5547 \text{ mmol/L}$  |
| $d_{\text{L}} = 1.4 \times 10^{-5}$                               | $V_{\text{Mfb}} = -47.75 \text{ mV}$                    |
| $f_{\text{L1}} = 0.9986$                                          | $r_{\text{Kv}} = 0.0743$                                |
| $f_{\text{L2}} = 0.9986$                                          | $s_{\text{Kv}} = 0.9717$                                |
| $r = 1.089 \times 10^{-3}$                                        | $m_{\text{Mfb}} = 3.0 \times 10^{-3}$                   |
| $s = 0.9486$                                                      | $j_{\text{Mfb}} = 0.9989$                               |
| $r_{\text{Kur}} = 3.67 \times 10^{-4}$                            |                                                         |

## Glossary

|                  |                                 |                          |                                                         |
|------------------|---------------------------------|--------------------------|---------------------------------------------------------|
|                  | <b>Myocyte</b>                  | $\text{Vol}_{\text{i}}$  | Total cytosolic volume                                  |
| $I_{\text{Na}}$  | $\text{Na}^+$ current           | $\text{Vol}_{\text{d}}$  | Volume of the diffusion-restricted subsarcolemmal space |
| $I_{\text{CaL}}$ | L-type $\text{Ca}^{2+}$ current | $\text{Vol}_{\text{up}}$ | Volume of the sarcoplasmic reticulum uptake compartment |



|                   |                                                                                               |                                       |                                                                                                                    |
|-------------------|-----------------------------------------------------------------------------------------------|---------------------------------------|--------------------------------------------------------------------------------------------------------------------|
| $I_t$             | Transient outward $K^+$ current                                                               | $Vol_{rel}$                           | Volume of the sarcoplasmic reticulum release compartment                                                           |
| $I_{Kur}$         | Sustained outward $K^+$ current                                                               | $\tau_{Na^+}, \tau_K, \tau_{Ca^{2+}}$ | Time constant of diffusion of $Na^+$ , $K^+$ , and $Ca^{2+}$ from the bulk medium to the extracellular cleft space |
| $I_{K,s}$         | Slow delayed rectifier $K^+$ current                                                          | $\tau_{di}$                           | Time constant of diffusion from the restricted subsarcolemmal space to the cytosol                                 |
| $I_{K,r}$         | Rapid delayed rectifier $K^+$ current                                                         | $\bar{I}_{NaK}$                       | Maximum $Na^+$ - $K^+$ pump current                                                                                |
| $I_{K1}$          | Inwardly rectifying $K^+$ current                                                             | $k_{NaK,K}$                           | Half-maximum $K^+$ binding concentration for $I_{NaK}$                                                             |
| $I_{B,Na}$        | Background $Na^+$ current                                                                     | $k_{NaK,Na}$                          | Half-maximum $Na^+$ binding concentration for $I_{NaK}$                                                            |
| $I_{B,Ca}$        | Background $Ca^{2+}$ current                                                                  | $\bar{I}_{CaP}$                       | Half-maximum $Ca^{2+}$ binding concentration for $I_{CaP}$                                                         |
| $I_{NaK}$         | $Na^+$ - $K^+$ pump current                                                                   | $k_{NaCa}$                            | Scaling factor for $I_{NaCa}$                                                                                      |
| $I_{CaP}$         | Sarcolemmal $Ca^{2+}$ pump current                                                            | $\gamma$                              | Position of energy barrier controlling voltage dependence of $I_{NaCa}$                                            |
| $I_{NaCa}$        | $Na^+$ - $Ca^{2+}$ exchange current                                                           | $d_{NaCa}$                            | Denominator constant for $I_{NaCa}$                                                                                |
| $I_{di}$          | $Ca^{2+}$ diffusion current from the diffusion-restricted subsarcolemmal space to the cytosol | $\bar{I}_{up}$                        | Maximum sarcoplasmic reticulum uptake current                                                                      |
| $I_{up}$          | Sarcoplasmic reticulum $Ca^{2+}$ uptake current                                               | $k_{cyca}$                            | Half-maximum binding concentration for $[Ca^{2+}]_i$ to $I_{ub}$                                                   |
| $I_{tr}$          | Sarcoplasmic reticulum $Ca^{2+}$ translocation current (from uptake to release compartment)   | $k_{srca}$                            | Half-maximum binding concentration for $[Ca^{2+}]_{up}$ to $I_{up}$                                                |
| $I_{rel}$         | Sarcoplasmic reticulum $Ca^{2+}$ release current                                              | $K_{xcs}$                             | Ratio of forward to back reactions for $I_{up}$                                                                    |
| $[Na^+]_b$        | $Na^+$ concentration in bulk (bathing) medium                                                 | $\tau_{tr}$                           | Time constant of diffusion of $Ca^{2+}$ from sarcoplasmic reticulum uptake to release compartment                  |
| $[K^+]_b$         | $K^+$ concentration in bulk (bathing) medium                                                  | $\alpha_{rel}$                        | Scaling factor for $I_{rel}$                                                                                       |
| $[Ca^{2+}]_b$     | $Ca^{2+}$ concentration in bulk (bathing) medium                                              | $k_{rel,i}$                           | Half-activation $[Ca^{2+}]_i$ for $I_{rel}$                                                                        |
| $[Na^+]_c$        | $Na^+$ concentration in the extracellular cleft space                                         | $k_{rel,d}$                           | Half-activation $[Ca^{2+}]_d$ for $I_{rel}$                                                                        |
| $[K^+]_c$         | $K^+$ concentration in the extracellular cleft space                                          | $k_{recov}$                           | Recovery rate constant for the sarcoplasmic reticulum release channel                                              |
| $[Ca^{2+}]_c$     | $Ca^{2+}$ concentration in the extracellular cleft space                                      | $I_{SAC}$                             | Stretch-activated current                                                                                          |
| $[Na^+]_i$        | $Na^+$ concentration in the intracellular medium                                              | $I_{SAC,Na}$                          | $Na^+$ contributes to $I_{sac}$                                                                                    |
| $[K^+]_i$         | $K^+$ concentration in the intracellular medium                                               | $I_{SAC,K}$                           | $K^+$ contributes to $I_{sac}$                                                                                     |
| $[Ca^{2+}]_i$     | $Ca^{2+}$ concentration in the intracellular medium                                           | $I_{SAC,Ca}$                          | $Ca^{2+}$ contributes to $I_{sac}$                                                                                 |
| $[Mg^{2+}]_i$     | $Mg^{2+}$ concentration in the intracellular medium                                           | $\bar{P}_{Na}$                        | Relative permeability to $Na^+$                                                                                    |
| $[Ca^{2+}]_d$     | $Ca^{2+}$ concentration in the restricted subsarcolemmal space                                | $\bar{P}_K$                           | Relative permeability to $K^+$                                                                                     |
| $[Ca^{2+}]_{up}$  | $Ca^{2+}$ concentration in the sarcoplasmic reticulum uptake compartment                      | $\bar{P}_{Ca}$                        | Relative permeability to $Ca^{2+}$                                                                                 |
| $[Ca^{2+}]_{rel}$ | $Ca^{2+}$ concentration in the sarcoplasmic reticulum release compartment                     | $z_{Na}$                              | $Na^+$ valence                                                                                                     |
| $E_{Na}$          | Equilibrium (Nernst) potential for $Na^+$                                                     | $z_K$                                 | $K^+$ valence                                                                                                      |
| $E_K$             | Equilibrium (Nernst) potential for $K^+$                                                      | $z_{Ca}$                              | $Ca^{2+}$ valence                                                                                                  |
| $E_{Ca}$          | Equilibrium (Nernst) potential for $Ca^{2+}$                                                  | $g_{SAC}$                             | Conductance for $I_{sac}$                                                                                          |
| $E_{Ca,app}$      | Apparent reversal potential for $I_{CaL}$                                                     | $G_{SAC}$                             | Maximum conductance for $I_{sac}$                                                                                  |
| $P_{Na}$          | Permeability for $I_{Na}$                                                                     | $K_{SAC}$                             | Parameter to define the amount of current when the cell is not stretched                                           |
| $\bar{g}_{CaL}$   | Maximum conductance for $I_{CaL}$                                                             | $\alpha_{SAC}$                        | Parameter to describe the sensitivity to stretch                                                                   |
| $\bar{g}_t$       | Maximum conductance for $I_t$                                                                 | $\lambda$                             | Stretch ratio                                                                                                      |
| $\bar{g}_{Kur}$   | Maximum conductance for $I_{Kur}$                                                             |                                       | <b>Myofibroblast</b>                                                                                               |
| $\bar{g}_{K,s}$   | Maximum conductance for $I_{K,s}$                                                             | $I_{KV\_Mfb}$                         | Time- and voltage-dependent $K^+$ current                                                                          |
| $\bar{g}_{K,r}$   | Maximum conductance for $I_{K,r}$                                                             | $I_{K1\_Mfb}$                         | Inward-rectifying $K^+$ current                                                                                    |

|                                |                                                                                                                          |                                      |                                                                      |
|--------------------------------|--------------------------------------------------------------------------------------------------------------------------|--------------------------------------|----------------------------------------------------------------------|
| $\bar{g}_{K1}$                 | Maximum conductance for $I_{K1}$                                                                                         | $I_{NaK\_Mfb}$                       | Na <sup>+</sup> -K <sup>+</sup> pump current                         |
| $\bar{g}_{B,Na}$               | Maximum conductance for $I_{B,Na}$                                                                                       | $I_{B,Na\_Mfb}$                      | Background Na <sup>+</sup> current                                   |
| $\bar{g}_{B,Ca}$               | Maximum conductance for $I_{B,Ca}$                                                                                       | $I_{Na\_Mfb}$                        | Na <sup>+</sup> current                                              |
| $m$                            | Activation gating variable for $I_{Na}$                                                                                  | $I_{MGC\_Mfb}$                       | Mechano-gated current                                                |
| $h_1, h_2$                     | Fast and slow inactivation gating variables for $I_{Na}$                                                                 | $[Na^+]_{e,Mfb}$                     | Na <sup>+</sup> concentration in the extracellular cleft space       |
| $d_L$                          | Activation gating variable for $I_{CaL}$                                                                                 | $[K^+]_{e,Mfb}$                      | K <sup>+</sup> concentration in the extracellular cleft space        |
| $f_{L1}, f_{L2}$               | Fast and slow inactivation gating variables for $I_{CaL}$                                                                | $[Na^+]_{i,Mfb}$                     | Na <sup>+</sup> concentration in the intracellular medium            |
| $f_{Ca}$                       | [Ca <sup>2+</sup> ] <sub>i</sub> -dependent ratio of fast ( $f_{L1}$ ) to slow ( $f_{L2}$ ) inactivation of $I_{CaL}$    | $[K^+]_{i,Mfb}$                      | K <sup>+</sup> concentration in the intracellular medium             |
| $k_{Ca}$                       | Half-maximum Ca <sup>2+</sup> binding concentration for $f_{Ca}$                                                         | $E_{Na,Mfb}$                         | Equilibrium (Nernst) potential for Na <sup>+</sup>                   |
| $r$                            | Activation gating variable for $I_t$                                                                                     | $E_{K,Mfb}$                          | Equilibrium (Nernst) potential for K <sup>+</sup>                    |
| $s$                            | Inactivation gating variable for $I_t$                                                                                   | $E_{MGC,Mfb}$                        | Equilibrium (Nernst) potential for ion through mechano-gate channels |
| $s_1, s_2$                     | Rapidly and slowly recovering inactivation gating variables for $I_t$                                                    | $\bar{g}_{Kv,Mfb}$                   | Maximum conductance for $I_{Kv\_Mfb}$                                |
| $r_{Kur}$                      | Activation gating variable for $I_{Kur}$                                                                                 | $\bar{g}_{K1,Mfb}$                   | Maximum conductance for $I_{K1\_Mfb}$                                |
| $s_{Kur}$                      | Inactivation gating variable for $I_{Kur}$                                                                               | $\bar{g}_{B,Na,Mfb}$                 | Maximum conductance for $I_{b,Na\_Mfb}$                              |
| $n$                            | Activation gating variable for $I_{K,s}$                                                                                 | $\bar{g}_{Na,Mfb}$                   | Maximum conductance for $I_{Na\_Mfb}$                                |
| $p_a$                          | Activation gating variable for $I_{K,r}$                                                                                 | $\bar{g}_{MGC,Mfb}$                  | Maximum conductance for $I_{MGC\_Mfb}$                               |
| $p_i$                          | Inactivation gating variable (instantaneous) for $I_{K,r}$                                                               | $r_{Kv}$                             | Activation gating variable for $I_{Kv\_Mfb}$                         |
| $\bar{m}, \bar{h}_1, \dots$    | Steady-state value of $m, h_1$ , etc                                                                                     | $S_{Kv}$                             | Inactivation gating variable for $I_{Kv\_Mfb}$                       |
| $F_1$                          | Relative amount of "inactive precursor" in the $I_{rel}$ formulation                                                     | $\tau_{r_{Kv}}$                      | Activation time constant for $I_{Kv\_Mfb}$                           |
| $F_2$                          | Relative amount of "activator" in the $I_{rel}$ formulation                                                              | $\tau_{s_{Kv}}$                      | Inactivation time constant for $I_{Kv\_Mfb}$                         |
| $\tau_m$                       | Activation time constant for $I_{Na}$                                                                                    | $\alpha_{K1}, \beta_{K1}$            | Fractional open probability of the $I_{K1\_Mfb}$ channel             |
| $\tau_{h_1}, \tau_{h_2}$       | Fast and slow inactivation time constants for $I_{Na}$                                                                   | $\bar{I}_{NaK,max}$                  | Maximum Na <sup>+</sup> -K <sup>+</sup> pump current                 |
| $\tau_{d_L}$                   | Activation time constant for $I_{CaL}$                                                                                   | $k_{mK}$                             | Half-maximum K <sup>+</sup> binding concentration for $I_{NaK}$      |
| $\tau_{f_{L1}}, \tau_{f_{L2}}$ | Fast and slow inactivation time constants for $I_{CaL}$                                                                  | $k_{mNa}$                            | Half-maximum Na <sup>+</sup> binding concentration for $I_{NaK}$     |
| $\tau_r$                       | Activation time constant for $I_t$                                                                                       | $m_{Mfb}$                            | Activation gating variable for $I_{Na\_Mfb}$                         |
| $\tau_s$                       | Inactivation time constant for $I_t$                                                                                     | $j_{Mfb}$                            | Inactivation gating variable for $I_{Na\_Mfb}$                       |
| $\tau_{r_{Kur}}$               | Activation time constant for $I_{Kur}$                                                                                   | $\tau_{m_{Mfb}}$                     | Activation time constant for $I_{Na\_Mfb}$                           |
| $\tau_{s_{Kur}}$               | Inactivation time constant for $I_{Kur}$                                                                                 | $\tau_{j_{Mfb}}$                     | Inactivation time constant for $I_{Na\_Mfb}$                         |
| $\tau_n$                       | Activation time constant for $I_{K,s}$                                                                                   | $\alpha_{m_{Mfb}}, \alpha_{j_{Mfb}}$ | Extrapolated rate coefficients                                       |
| $\tau_{p_a}$                   | Activation time constant for $I_{K,r}$                                                                                   | $\beta_{m_{Mfb}}, \beta_{j_{Mfb}}$   |                                                                      |
| $O$                            | Buffer occupancy                                                                                                         | $E_{Na,Mfb}$                         | Equilibrium (Nernst) potential for Na <sup>+</sup>                   |
| $O_C$                          | Fractional occupancy of the calmodulin buffer by Ca <sup>2+</sup>                                                        | $E_{K,Mfb}$                          | Equilibrium (Nernst) potential for K <sup>+</sup>                    |
| $O_{TC}$                       | Fractional occupancy of the troponin-Ca <sup>2+</sup> buffer by Ca <sup>2+</sup>                                         | $E_{MGC,Mfb}$                        | Equilibrium (Nernst) potential for ion through mechano-gate channels |
| $O_{TMgC}$                     | Fractional occupancy of the troponin-Mg <sup>2+</sup> buffer by Ca <sup>2+</sup>                                         | $\bar{r}_{Kv}, \bar{s}_{Kv}, \dots$  | Steady-state value of $r_{Kv}, s_{Kv}$ , etc                         |
| $O_{TMgMg}$                    | Fractional occupancy of the troponin-Mg <sup>2+</sup> buffer by Mg <sup>2+</sup>                                         | $C_{m,Mfb}$                          | Membrane capacitance                                                 |
| $O_{Calse}$                    | Fractional occupancy of the calsequestrin buffer (in the sarcoplasmic reticulum release compartment) by Ca <sup>2+</sup> | $V_{Mfb}$                            | Membrane voltage                                                     |
| $R$                            | Universal gas constant                                                                                                   | <b>Mfb-M coupling</b>                |                                                                      |
| $T$                            | Absolute temperature                                                                                                     | $G_{gap}$                            | Gap junctional conductance between Mfb and myocyte                   |
| $F$                            | Faraday's constant                                                                                                       | $n$                                  | Number of Mfbs per myocyte                                           |
| $C_{m,M}$                      | Membrane capacitance                                                                                                     | $I_M$                                | Net membrane current of the myocyte                                  |
|                                |                                                                                                                          | $I_{Mfb}$                            | Net membrane current of the Mfb                                      |

## References

- [1] M. M. Maleckar, J. L. Greenstein, W. R. Giles, and N. A. Trayanova, "K<sup>+</sup> current changes account for the rate dependence of the action potential in the human atrial myocyte," *Am J Physiol Heart Circ Physiol*, vol. 297, pp. H1398-410, 2009.
- [2] A. Nygren, C. Fiset, L. Firek, J. W. Clark, D. S. Lindblad, R. B. Clark, and W. R. Giles, "Mathematical model of an adult human atrial cell: the role of K<sup>+</sup> currents in repolarization," *Circ Res*, vol. 82, pp. 63-81, 1998.
- [3] N. H. Kuijpers, H. M. ten Eikelder, P. H. Bovendeerd, S. Verheule, T. Arts, and P. A. Hilbers, "Mechanoelectric feedback leads to conduction slowing and block in acutely dilated atria: a modeling study of cardiac electromechanics," *Am J Physiol Heart Circ Physiol*, vol. 292, pp. H2832-53, 2007.
- [4] D. Kim, "Novel cation-selective mechanosensitive ion channel in the atrial cell membrane," *Circ Res*, vol. 72, pp. 225-31, 1993.
- [5] K. A. MacCannell, H. Bazzazi, L. Chilton, Y. Shibukawa, R. B. Clark, and W. R. Giles, "A mathematical model of electrotonic interactions between ventricular myocytes and fibroblasts," *Biophysical Journal*, vol. 92, pp. 4121-4132, 2007.
- [6] A. Chatelier, A. Mercier, B. Tremblier, O. Theriault, M. Moubarak, N. Benamer, P. Corbi, P. Bois, M. Chahine, and J. F. Faivre, "A distinct de novo expression of Nav1.5 sodium channels in human atrial fibroblasts differentiated into myofibroblasts," *J Physiol*, vol. 590, pp. 4307-19, 2012.
- [7] A. Kamkin, S. Kirischuk, and I. Kiseleva, "Single mechano-gated channels activated by mechanical deformation of acutely isolated cardiac fibroblasts from rats," *Acta Physiol (Oxf)*, vol. 199, pp. 277-92, 2010.
